# Supplementary material for: Maternal Baseline Characteristics and Perinatal Outcomes: The Tohoku Medical Megabank Project Birth and Three-Generation Cohort Study
Source: PubMed Central journal article supplement (PMC8761563; doi:10.2188/jea.je20200338), 2022-02-05
Supplement: je-32-069-s001.pdf [file je-32-069-s001.pdf]

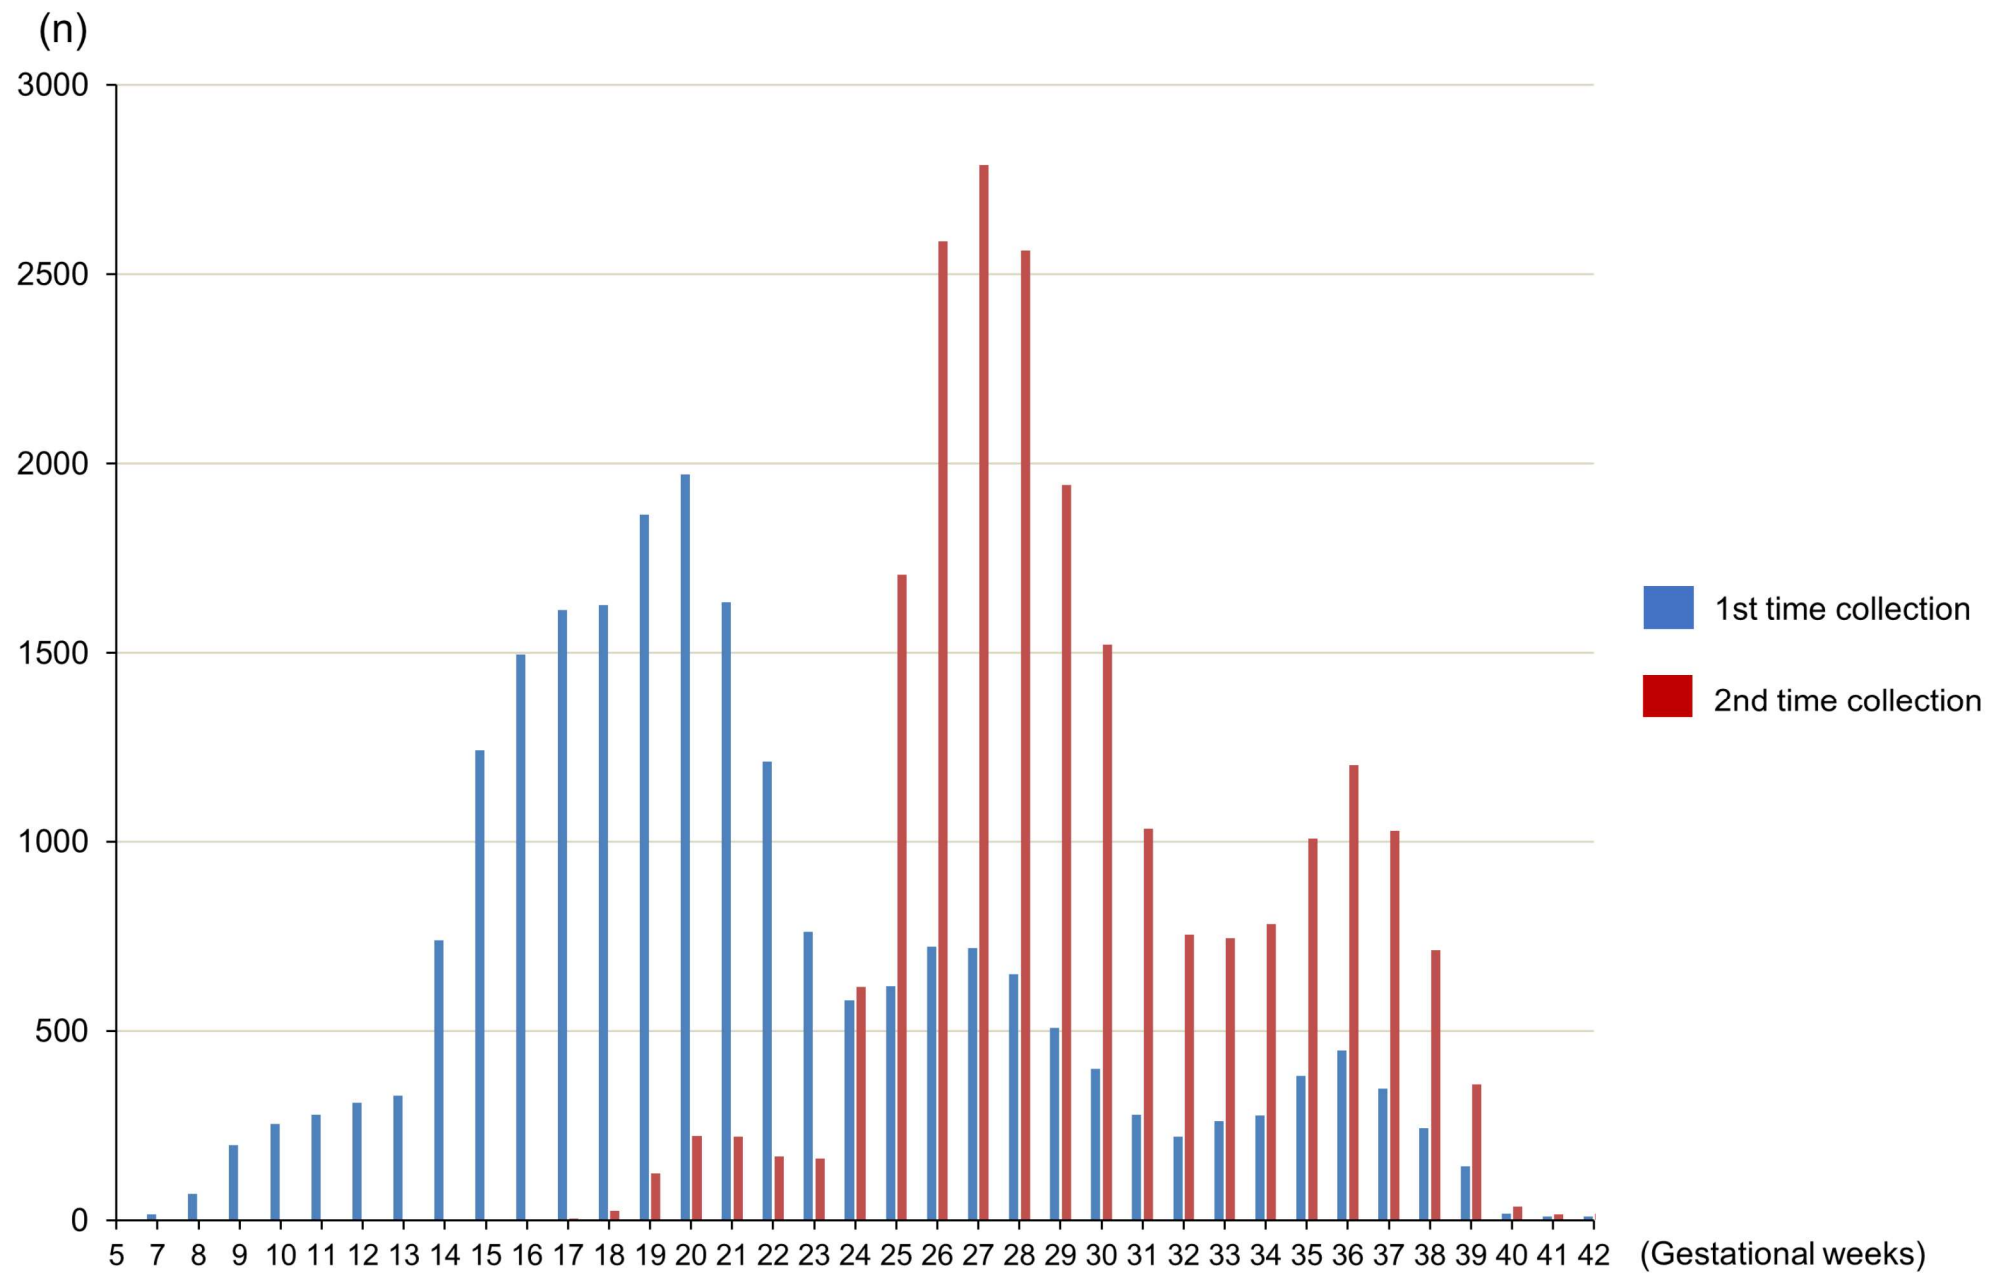

**eFigure 1.**  
 Gestational age at the time of maternal blood collection  
 (first time point, n=22,449; second time point, n=22,356)

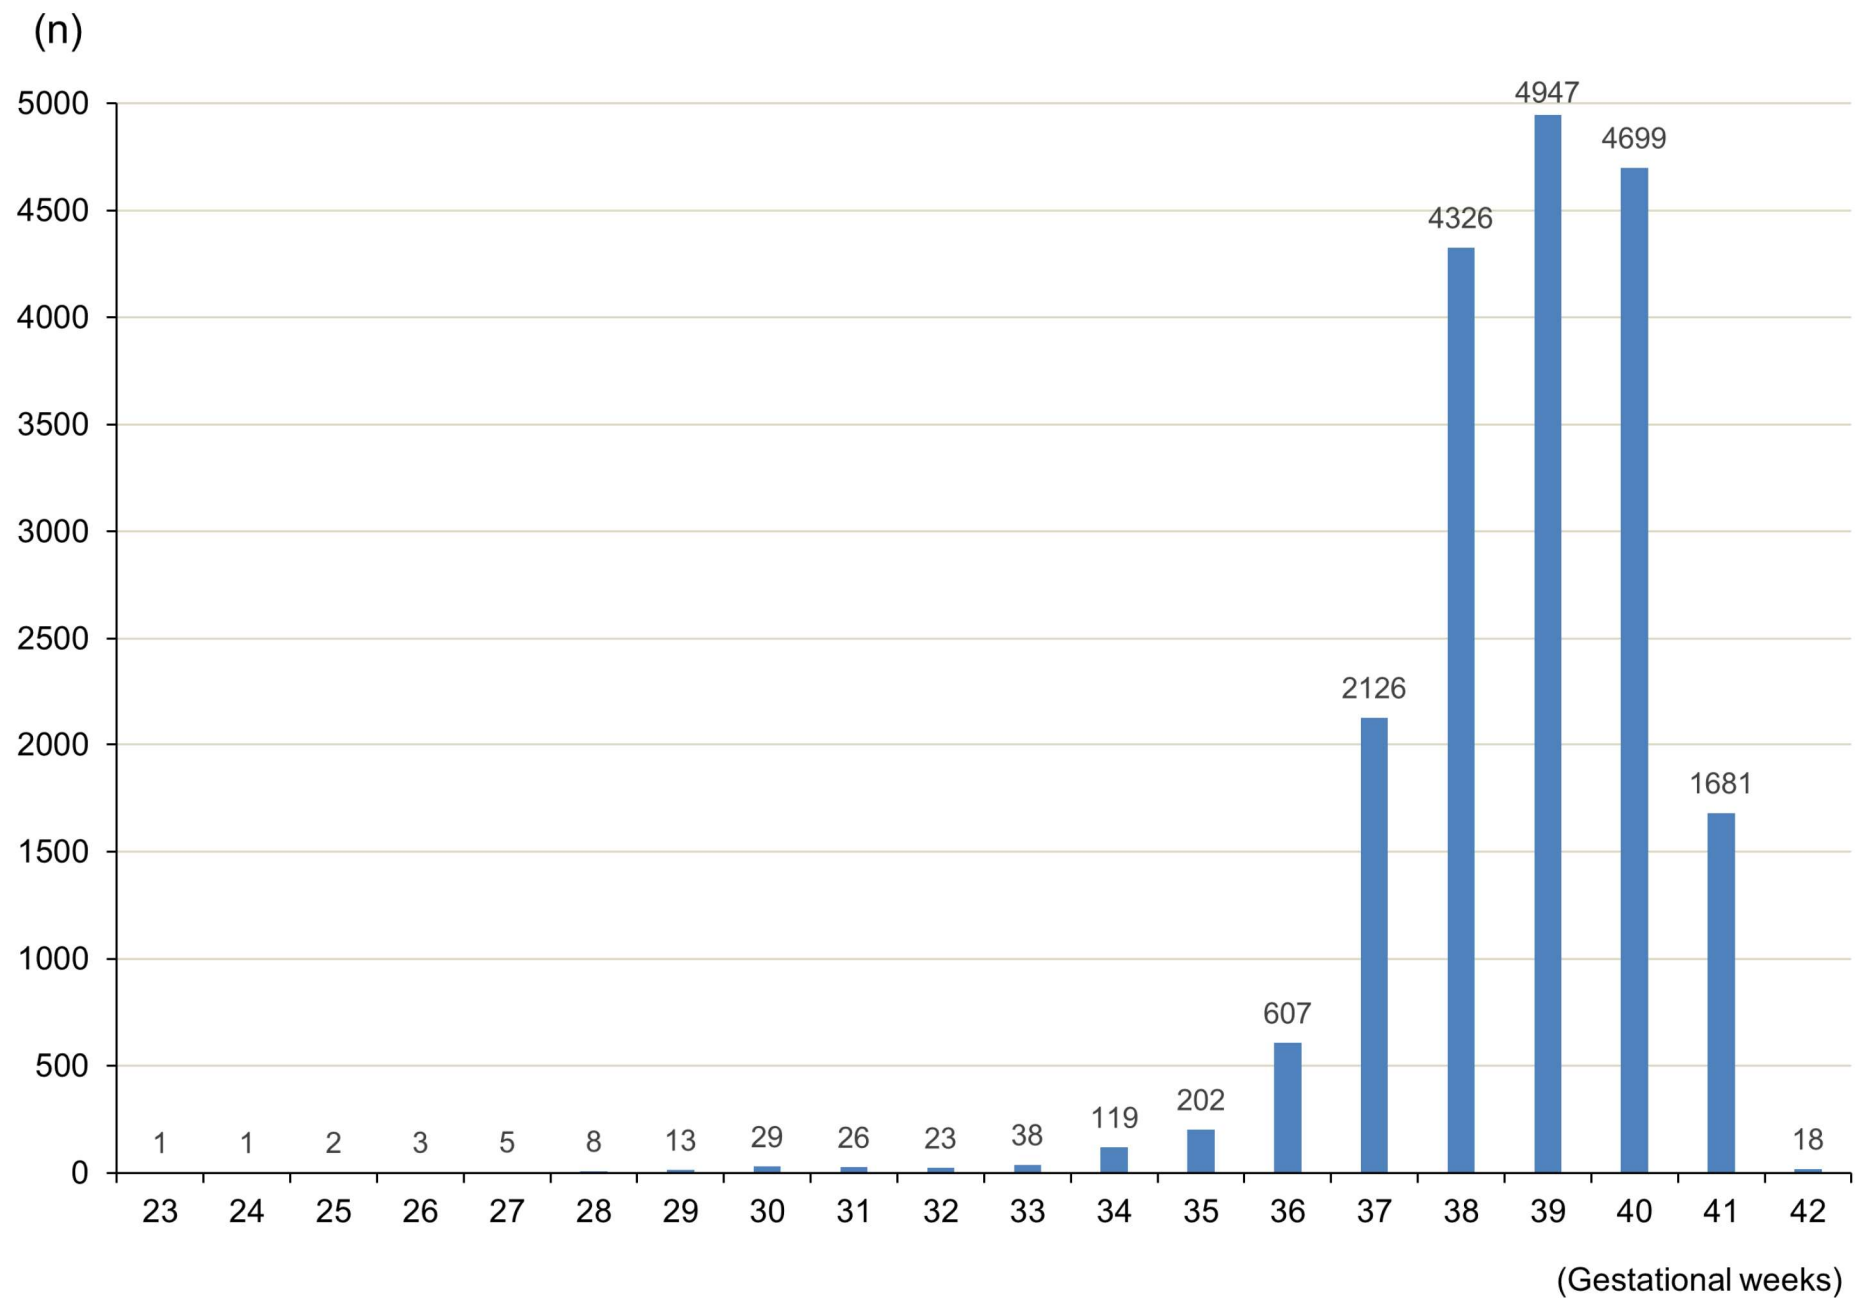

**eFigure 2.**

Gestational age at the time of cord blood collection (n=18,874)
